# Supplementary material for: Emergence of a Novel Lineage and Wide Spread of a blaCTX-M-15/IncHI2/ST1 Plasmid among Nosocomial Enterobacter in Guadeloupe
Source: MDPI journal article supplement (doi:10.3390/antibiotics11101443), 2022-10-20
Supplement: s1 [file s1]

# Emergence of a Novel Lineage and Wide Spread of a *bla*<sub>CTX-M-15</sub>/IncHI2/ST1 Plasmid among Nosocomial *Enterobacter* in Guadeloupe

Matthieu Pot <sup>1,\*</sup>, Yann Reynaud <sup>1</sup>, David Couvin <sup>1</sup>, Alexis Dereeper <sup>1</sup>, Séverine Ferdinand <sup>1</sup>, Sylvaine Bastian <sup>2</sup>, Tania Foucan <sup>3</sup>, Jean-David Pommier <sup>4</sup>, Marc Valette <sup>4</sup>, Antoine Talarmin <sup>1</sup>, Stéphanie Guyomard-Rabenirina <sup>1</sup> and Sébastien Breurec <sup>1,5,6</sup>

<sup>1</sup> Transmission, Reservoir and Diversity of Pathogens Unit, Pasteur Institute of Guadeloupe, 97139 Les Abymes, France

<sup>2</sup> Laboratory of Clinical Microbiology, University Hospital Center of Guadeloupe, 97159 Pointe-à-Pitre, France

<sup>3</sup> Operational Hygiene Team, University Hospital Center of Guadeloupe, 97159 Pointe-à-Pitre, France

<sup>4</sup> Division of Intensive Care, University Hospital Center of Guadeloupe, 97159 Pointe-à-Pitre, France

<sup>5</sup> Faculty of Medicine Hyacinthe Bastaraud, University of the Antilles, 97157 Pointe-à-Pitre, France

<sup>6</sup> INSERM, Center for Clinical Investigation 1424, 97139 Les Abymes, France

\* Correspondence: matthieu.pot@ird.fr

## Supplementary Materials

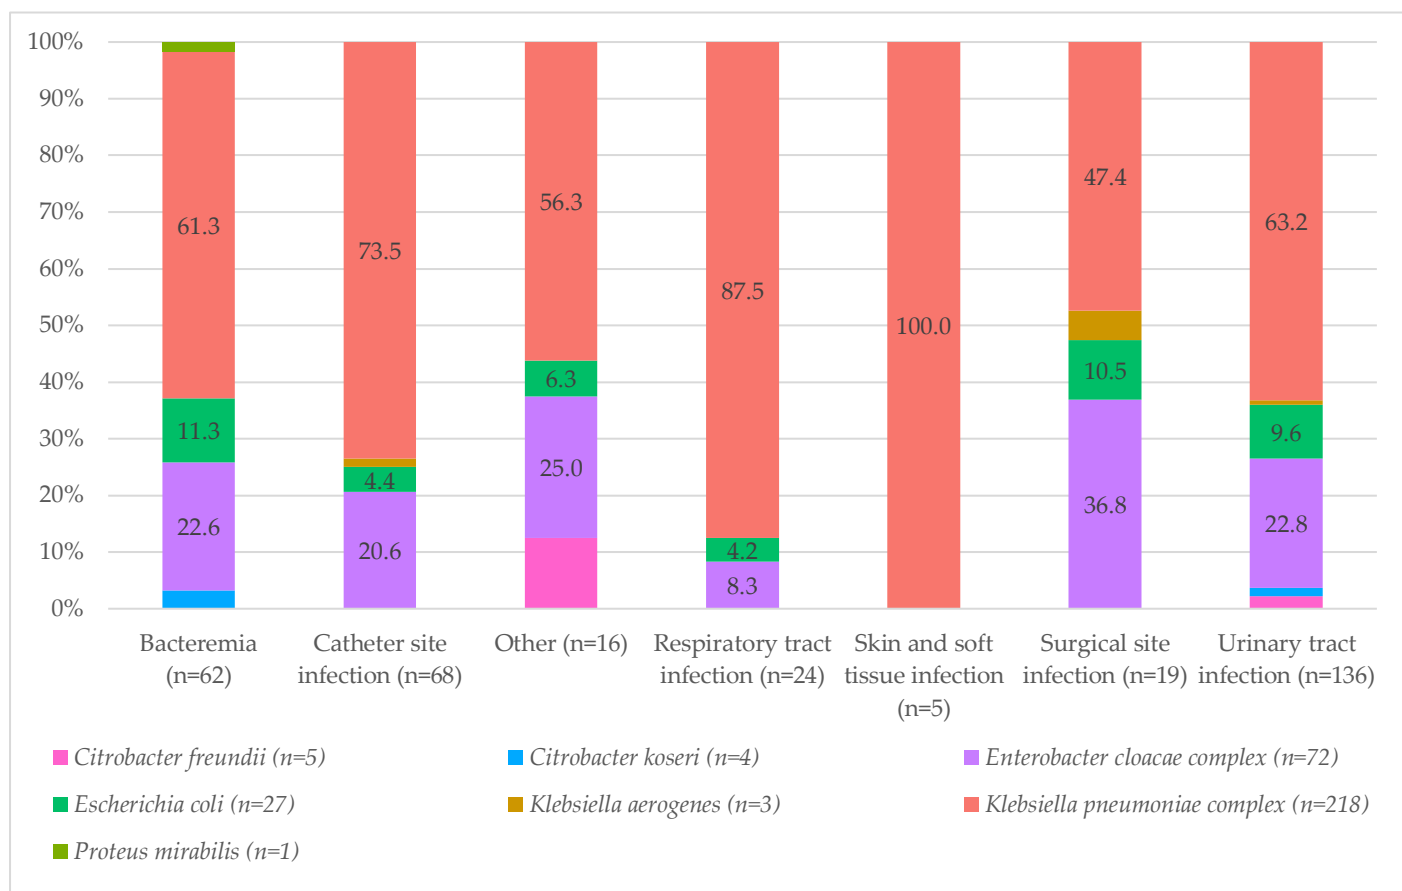

**Figure S1. Overall incidence of ESBL-producing *Enterobacteriaceae* at the University Hospital Center of Guadeloupe between 2018 and 2019 ( $n = 330$ ).** These data were sorted using the GAM software for management of medical, administrative and financial patient data. The species were grouped according to the site of nosocomial infection. Only the prevalence of the three most represented species is shown on the graph (see details on Supplementary Data Set S2).

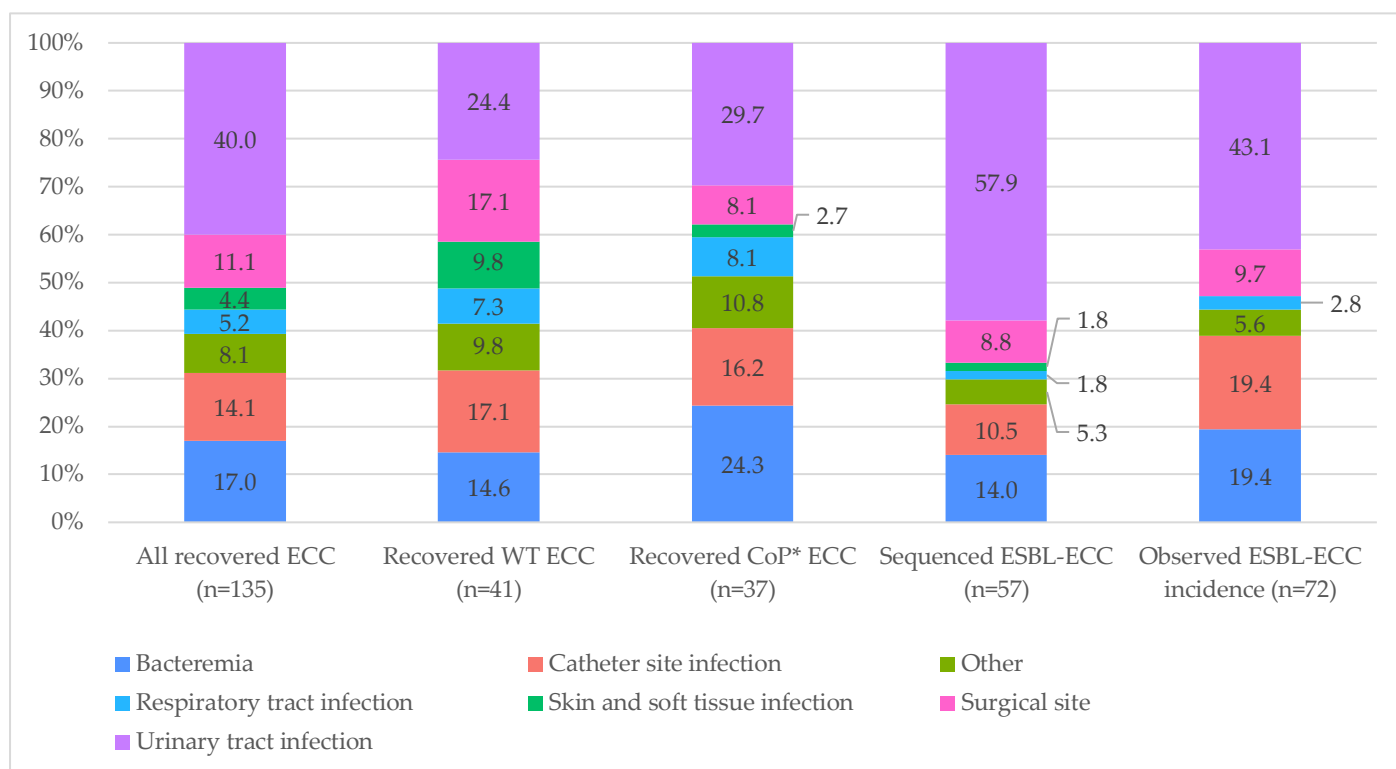

**Figure S2. Distribution of *Enterobacter cloacae* complex strains according to the type of infection site.** Recovered ECC isolates were grouped according to their resistance to  $\beta$ -lactam antibiotics: wild-type resistance profile (WT), sequenced ECC with extended-spectrum- $\beta$ -lactamase (ESBL), and ECC with cephalosporinase overproduction without ESBL gene (CoP). \* Among the CoP strains, one isolate was identified as a carbapenemase producer and was included on “Other” sample type. The observed ESBL-ECC incidence corresponds to data associated sorted using the GAM software for management of medical, administrative and financial patient data (see details on Supplementary Data Sets S1 and S2).

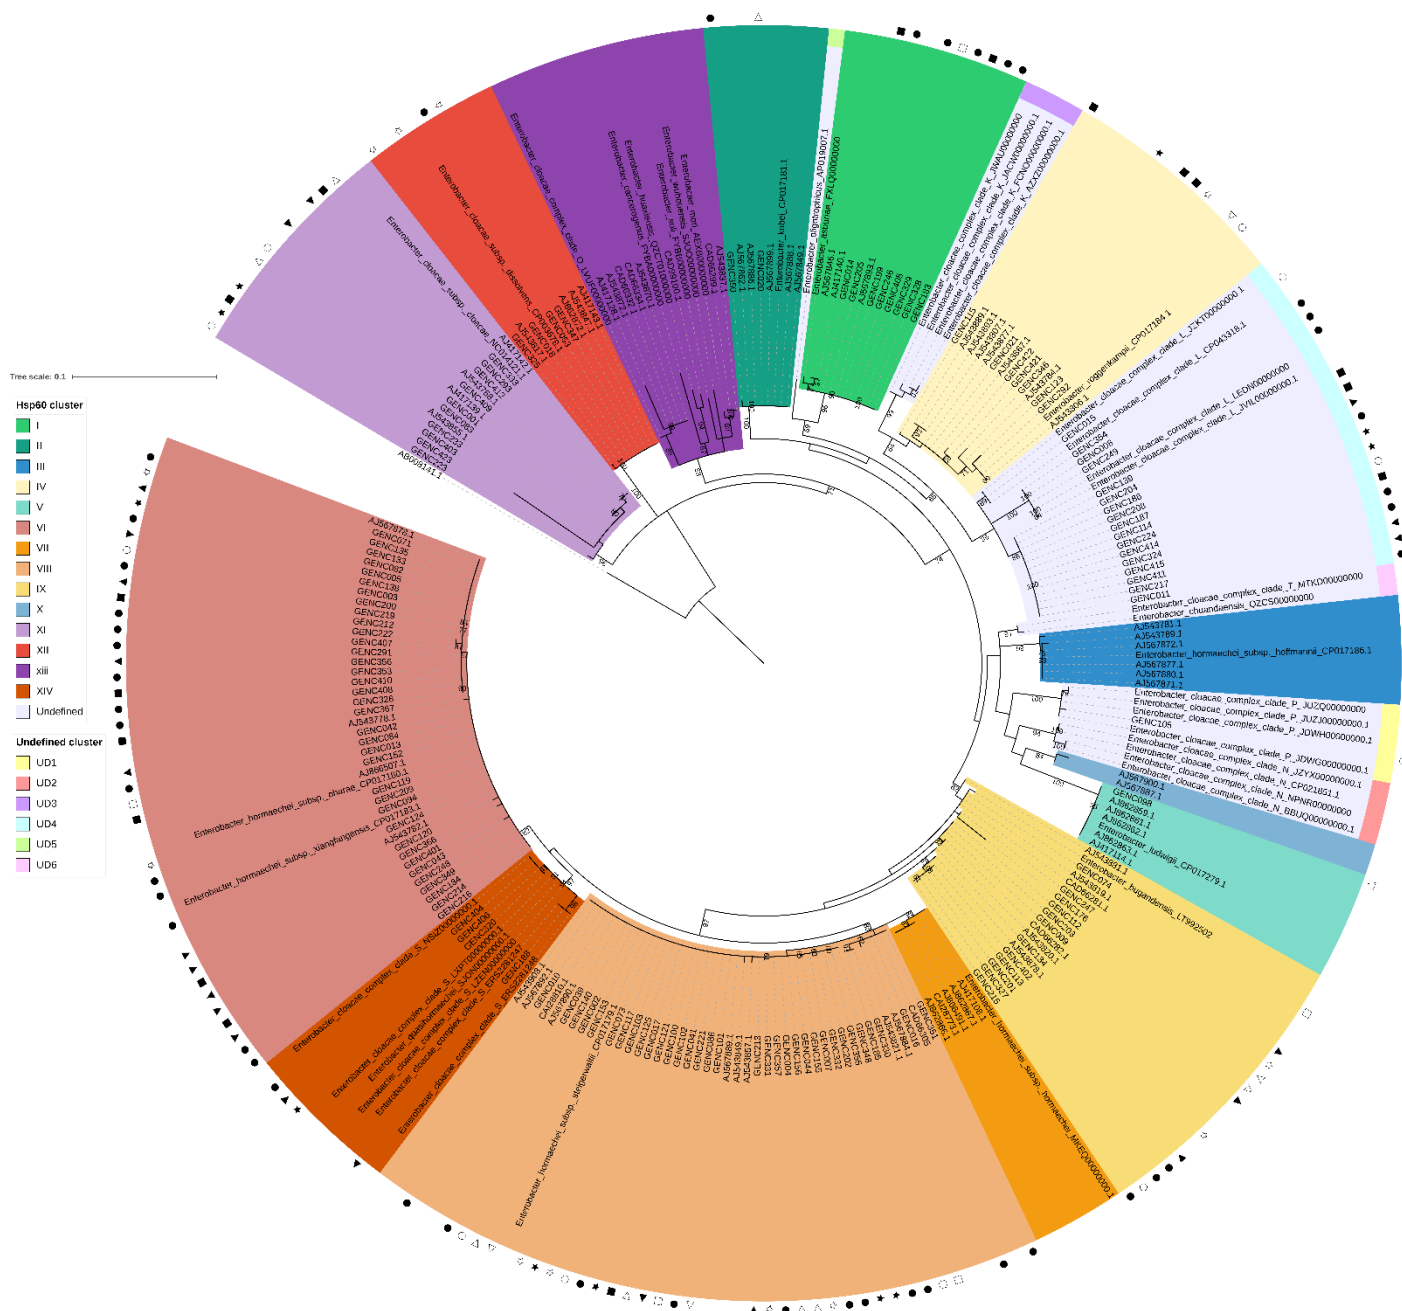

**Figure S3. Maximum likelihood phylogenetic tree based on the partial *hsp60* coding sequence of *E. cloacae* complex clinical isolates ( $n = 135$ ).** The tree drawn with iTOL v6.4.2 after maximum likelihood phylogenetic reconstruction with IQ-tree v2.1.2 and associated dependencies (–merit BIC: TIM3e+I+G4 –ufboot 1,000 –bnni), and sequence alignment with MAFFT (–flavor auto, v7.505) [1–5]. The 114 selected *E. cloacae* complex strains used as reference as described previously were labelled with the Sutton’s nomenclature or species name, the *hsp60* cluster number, the whole-genome-related groups and their GenBank accession number [6–8]. A color was attributed to each cluster group, and only bootstrap values  $\geq 60$  are indicated. The numbers of the undefined (UD) *hsp60* cluster are the same as those used previously and cluster UD4 reference nodes were grouped for easier readability [8]. The most prevalent sample origins are sorted into four groups specified by the following symbols: circle (urine), square (blood), star (abscess, deep abscess, peritoneal liquid and pus), and left-pointing triangle (medical device: catheter); those with a right-pointing triangle are the least prevalent sample types, associated with respiratory tract infection (bronchial aspiration, bronchoalveolar lavage) and other infection sites. Antibiotic resistance profiles against  $\beta$ -lactam antibiotics are shown in white for wild-type strains and in black for third-generation cephalosporin-resistant strains. The global distribution, partial sequences and comparison with the *hsp60*EC-Ctool outputs are provided in Supplementary Data Set S1 [9].

---

List of ECC partial *hps60* sequence references included in this figure (associated cluster: C or UD, and accession number). This list is the same as the one used in our previous manuscript [8]:

**C-I:** AJ417140.1, AJ567846.1, AJ567893.1, FXLQ000000000; **C-II:** AJ567849.1, AJ567862.1, AJ567886.1, AJ567888.1, AJ567899.1, CP017181.1, **C-III:** AJ543781.1, AJ543789.1, AJ567871.1, AJ567872.1, AJ567877.1, AJ567880.1, CP017186.1; **C-IV:** AJ543784.1, AJ543806.1, AJ543807.1, AJ543867.1, AJ543877.1, AJ543889.1, AJ543893.1, CP017184.1; **C-V:** AJ417114.1, AJ862859.1, AJ862861.1, AJ862862.1, AJ862863.1, CP017279.1; **C-VI:** AJ543778.1, AJ543782.1, AJ567878.1, AJ866507.1, CP017180.1, CP017183.1; **C-VII:** AJ417108.1, AJ862866.1, AJ862867.1, AJ866491.1, CAI28773.1, MKEQ000000000.1; **C-VIII:** AJ543821.1, AJ543849.1, AJ543857.1, AJ543908.1, AJ567884.1, AJ567889.1, AJ567890.1, AJ567892.1, CAD66305, CAI28810.1, CP017179.1; **C-IX:** AJ543819.1, AJ543820.1, AJ543878.1, AJ543881.1, CAD66281.1, CAD66282.1, LT992502; **C-XI:** AJ417139.1, AJ417142.1, AJ543768.1, AJ543855.1, NC014121.1; **CXII:** AJ417143.1, AJ543817.1, AJ543847.1, AJ862872.1, CP003678.1; **C-XIII:** AJ417128.1, AJ543837.1, AJ543870.1, AJ543872.1, CAD66299.1, CAD66332.1, CAD66334.1, CAD99100.1, LVUF000000000, FYBB000000000, SJO000000000, AEXB000000000, QZCT01000000, FYBA000000000; **C-XIV:** ERS2281247, ERS2281248, LXPT00000000.1, LZEN00000000, NSIZ00000000.1, JON00000000.1; **UD1:** JDWG00000000.1, JDWH00000000.1, JUZJ00000000.1, JUZQ00000000; **UD2:** BBUQ00000000.1, CP021851.1, JZYX00000000.1, NPNR00000000; **UD3:** AZXZ00000000.1, FCNO00000000.1, JACW00000000.1, JWAU00000000; **UD4:** CP043318.1, JVIL00000000.1, JZKT00000000.1, LEDN00000000; **UD5:** AP019007.1; **UD6:** MTKD00000000, QZCS00000000.

+ **C-X** (*Lelliottia nimipressuralis*, formerly *E. nimipressuralis*)

The circular phylogenetic tree displays the following clusters and associated labels:

- Purple Sector:**
  - Enterobacter\_cloacae\_subsp.\_dissolvers\_CP03678.1
  - Enterobacter\_cloacae\_subsp.\_cloacae\_NC014121.1
  - GENC393
  - GENC412
  - AJ543768.1
  - GENC409
  - AJ417139.1
  - GENC083
  - GENC001
  - AJ543855.1
  - GENC233
  - GENC403
  - GENC223
  - AB008141.1
- Red Sector:**
  - Enterobacter\_cloacae\_complex\_clade\_O\_LVUF000000000
  - Enterobacter\_cloacae\_subsp.\_dissolvers\_CP03678.1
  - Enterobacter\_cloacae\_subsp.\_cloacae\_NC014121.1
  - GENC393
  - GENC412
  - AJ543768.1
  - GENC409
  - AJ417139.1
  - GENC083
  - GENC001
  - AJ543855.1
  - GENC233
  - GENC403
  - GENC223
  - AB008141.1
- Orange Sector:**
  - Enterobacter\_cloacae\_subsp.\_dissolvers\_CP03678.1
  - Enterobacter\_cloacae\_subsp.\_cloacae\_NC014121.1
  - GENC393
  - GENC412
  - AJ543768.1
  - GENC409
  - AJ417139.1
  - GENC083
  - GENC001
  - AJ543855.1
  - GENC233
  - GENC403
  - GENC223
  - AB008141.1
- Green Sector:**
  - Enterobacter\_cloacae\_subsp.\_dissolvers\_CP03678.1
  - Enterobacter\_cloacae\_subsp.\_cloacae\_NC014121.1
  - GENC393
  - GENC412
  - AJ543768.1
  - GENC409
  - AJ417139.1
  - GENC083
  - GENC001
  - AJ543855.1
  - GENC233
  - GENC403
  - GENC223
  - AB008141.1
- Yellow Sector:**
  - Enterobacter\_cloacae\_subsp.\_dissolvers\_CP03678.1
  - Enterobacter\_cloacae\_subsp.\_cloacae\_NC014121.1
  - GENC393
  - GENC412
  - AJ543768.1
  - GENC409
  - AJ417139.1
  - GENC083
  - GENC001
  - AJ543855.1
  - GENC233
  - GENC403
  - GENC223
  - AB008141.1
- Light Blue Sector:**
  - Enterobacter\_cloacae\_subsp.\_dissolvers\_CP03678.1
  - Enterobacter\_cloacae\_subsp.\_cloacae\_NC014121.1
  - GENC393
  - GENC412
  - AJ543768.1
  - GENC409
  - AJ417139.1
  - GENC083
  - GENC001
  - AJ543855.1
  - GENC233
  - GENC403
  - GENC223
  - AB008141.1



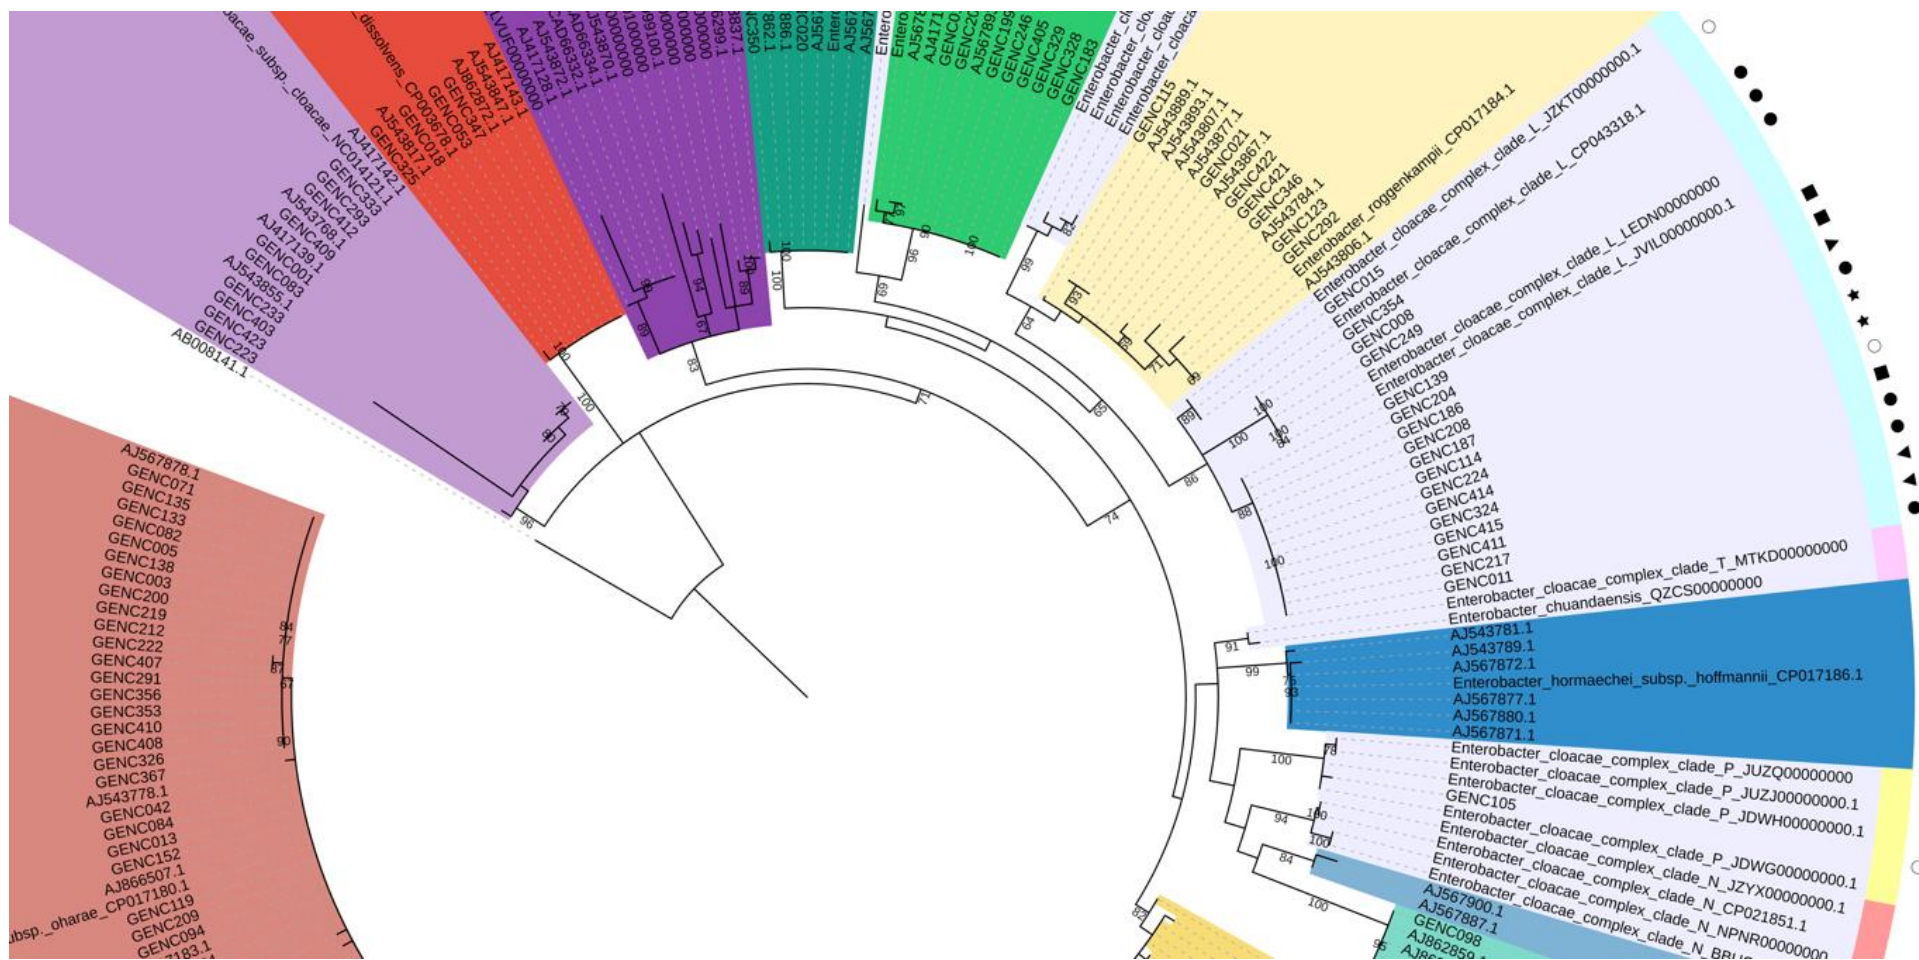

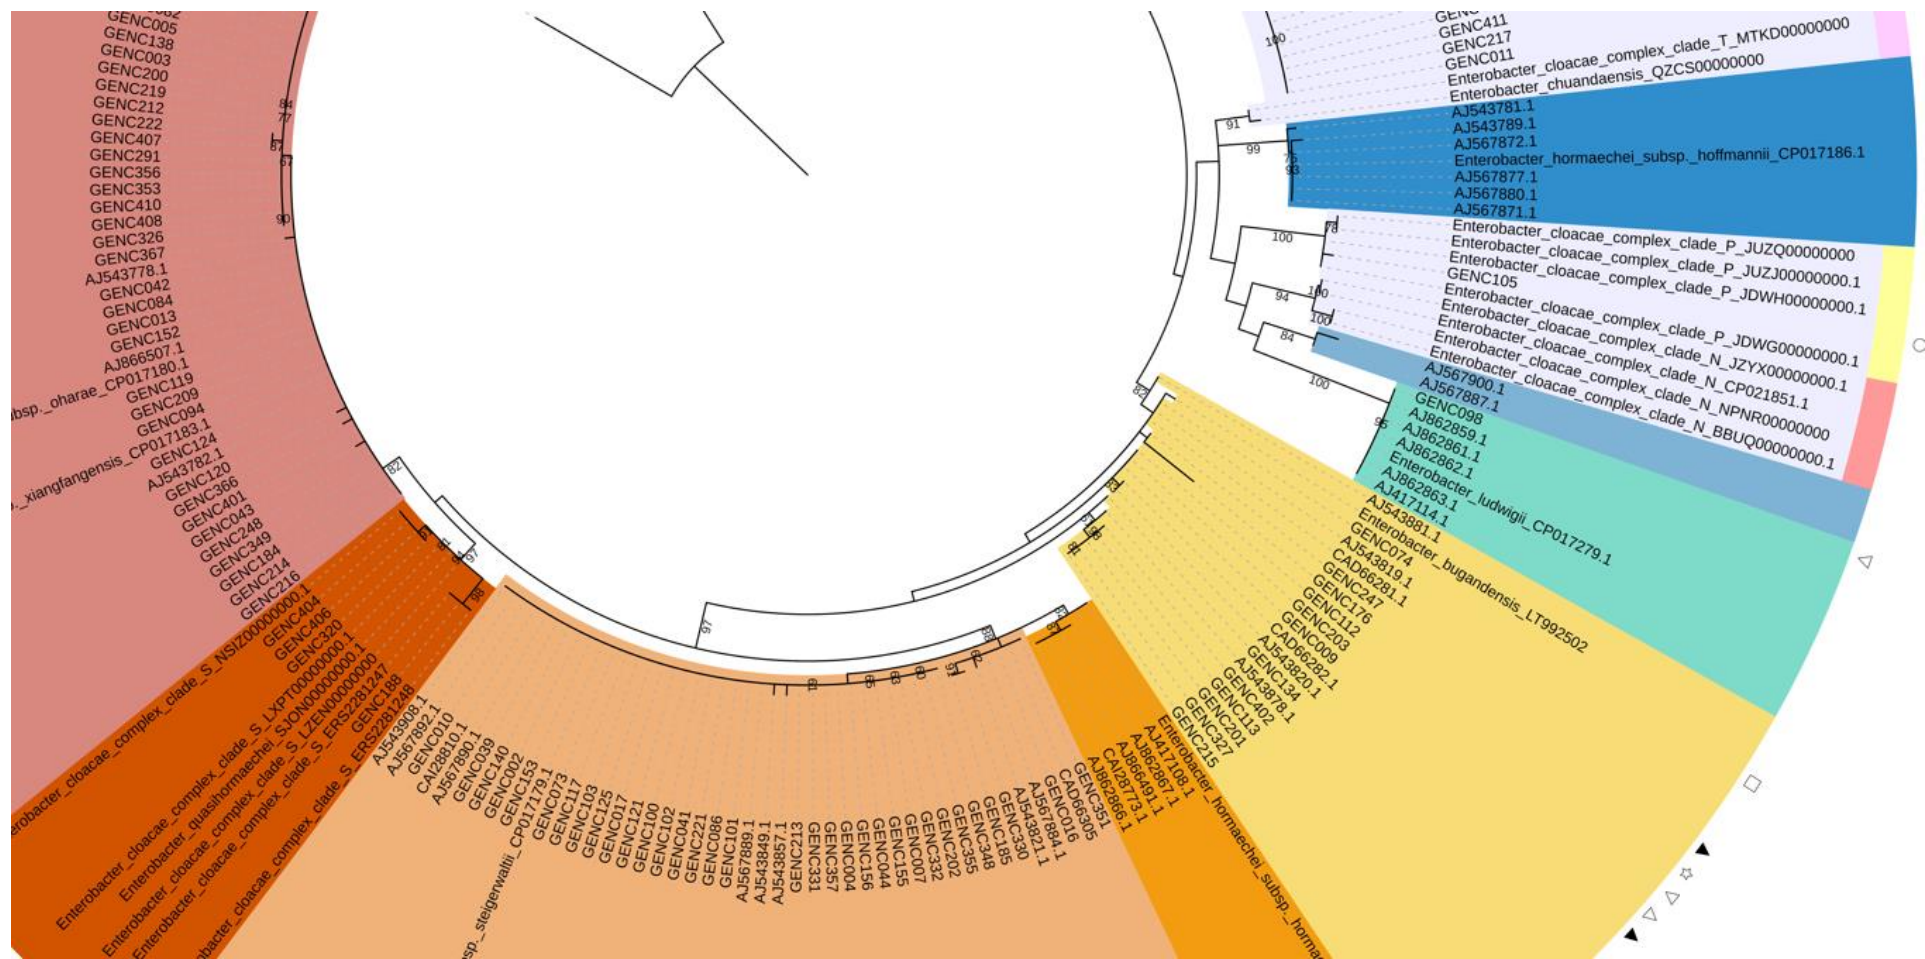



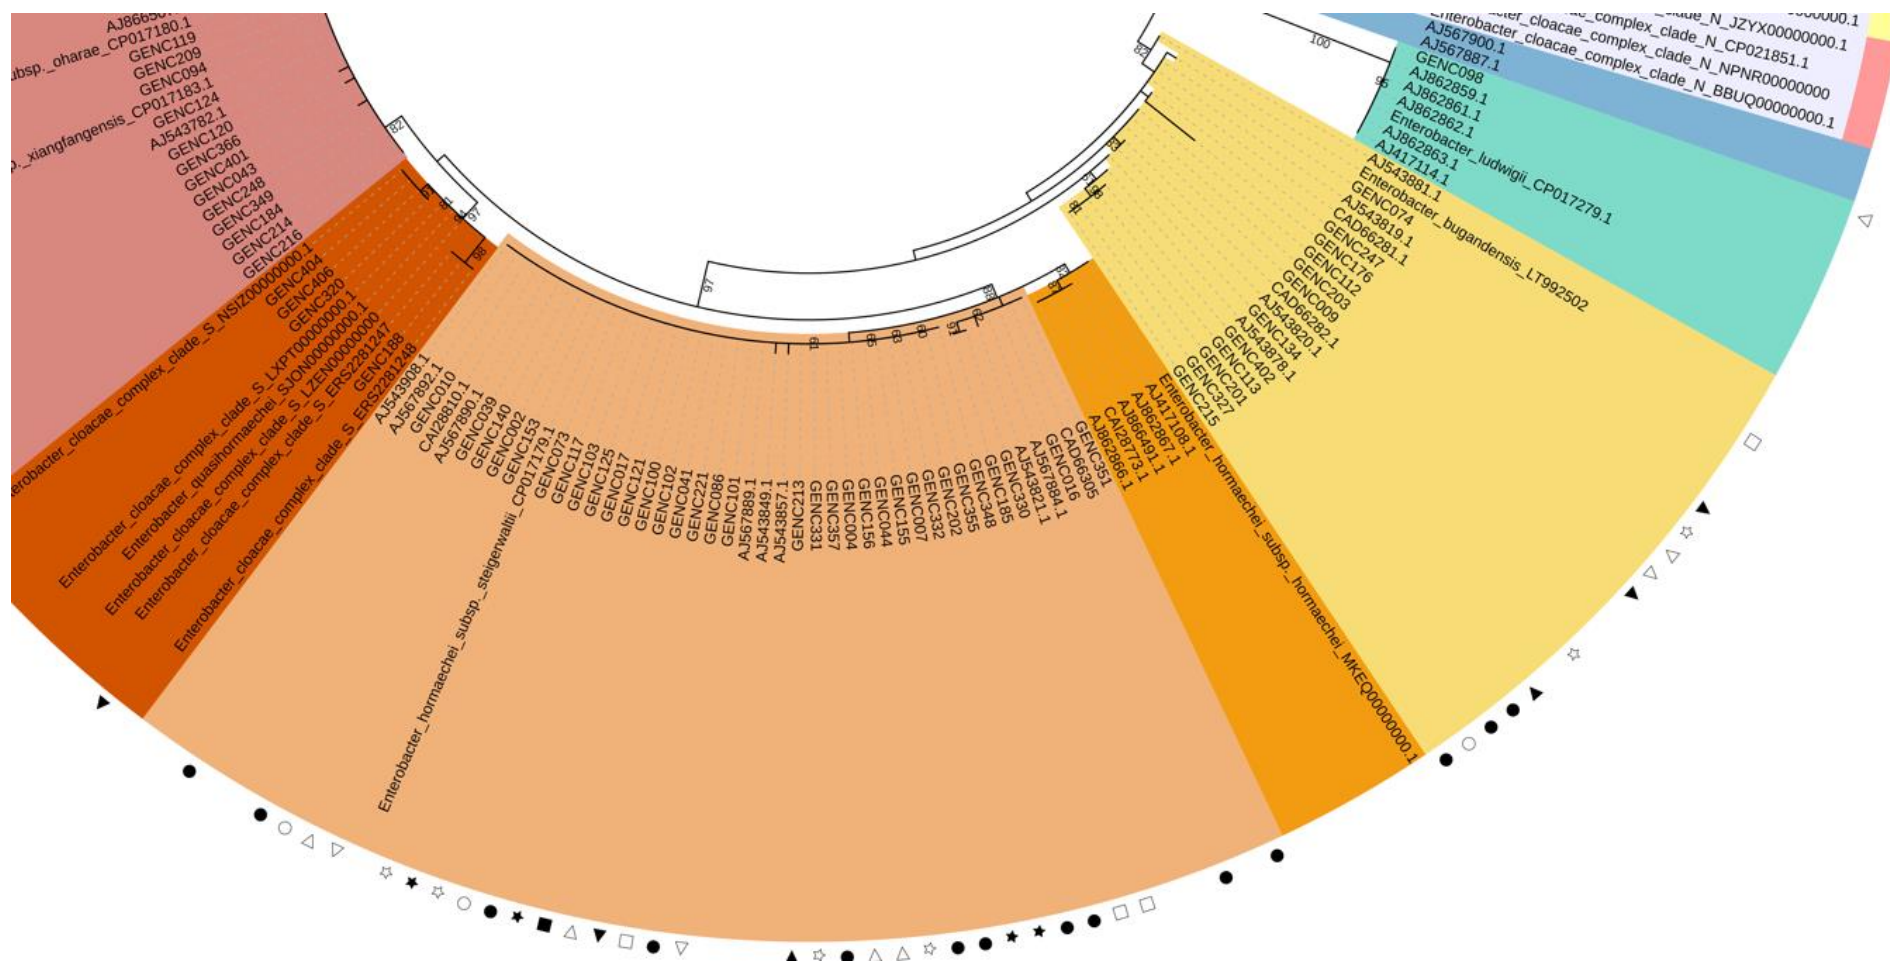

- UD2
- UD3
- UD4
- UD5
- UD6

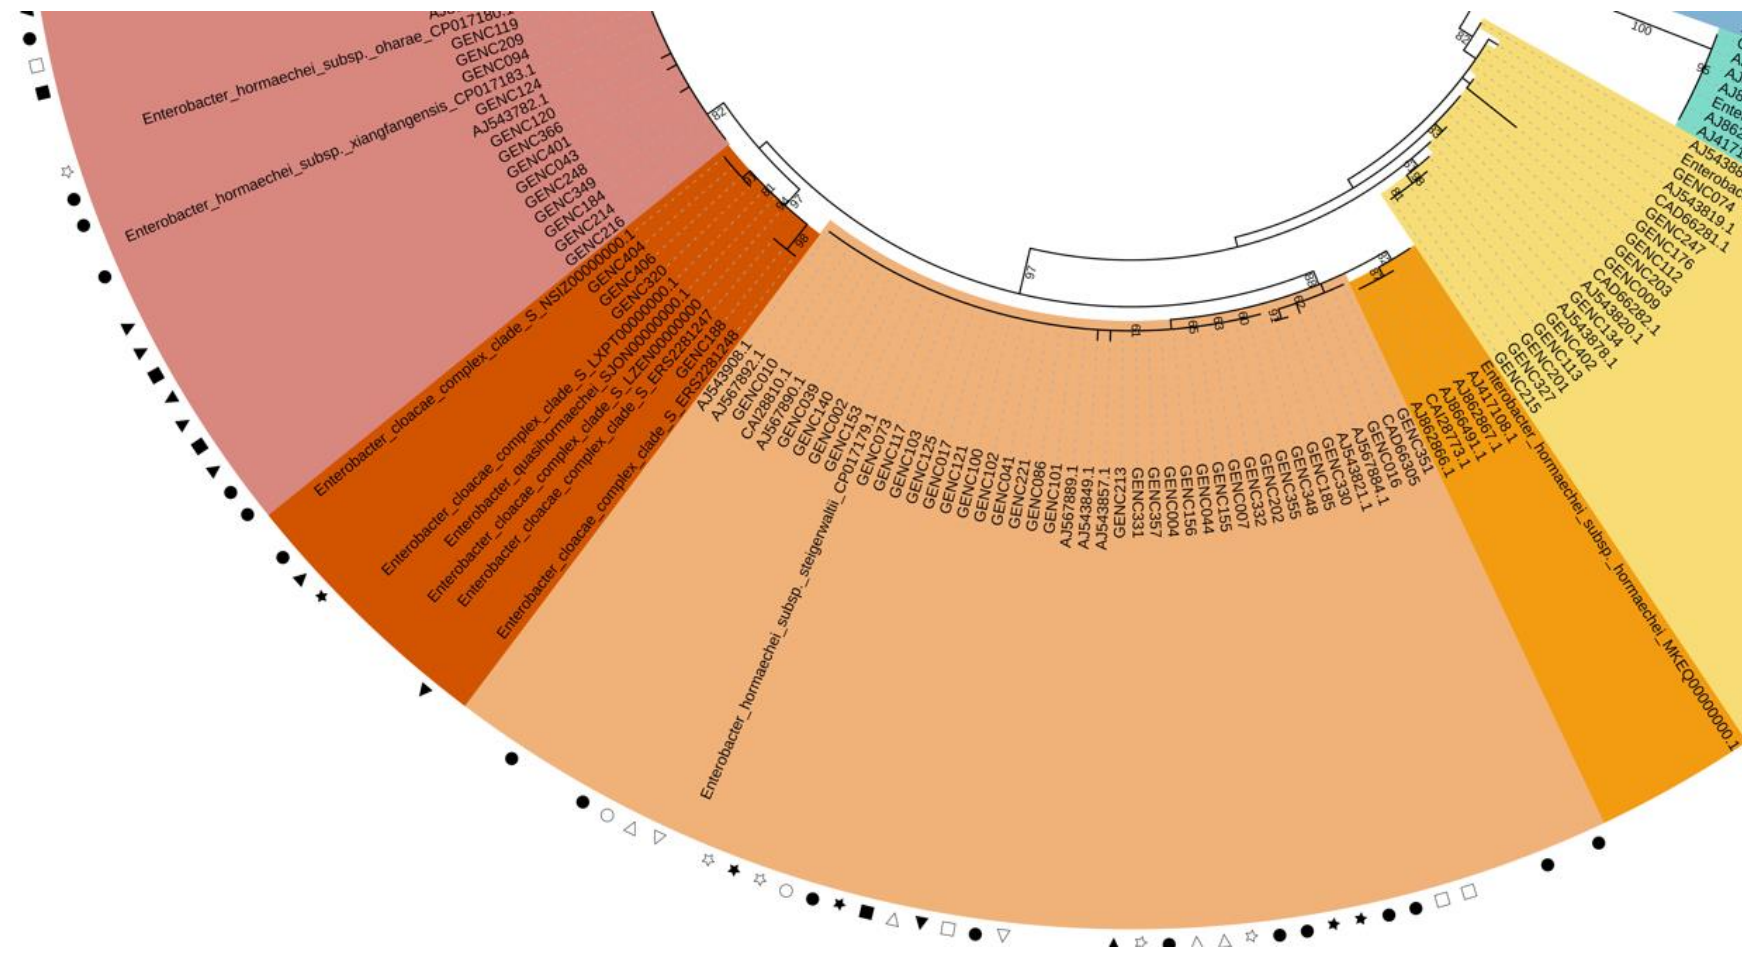

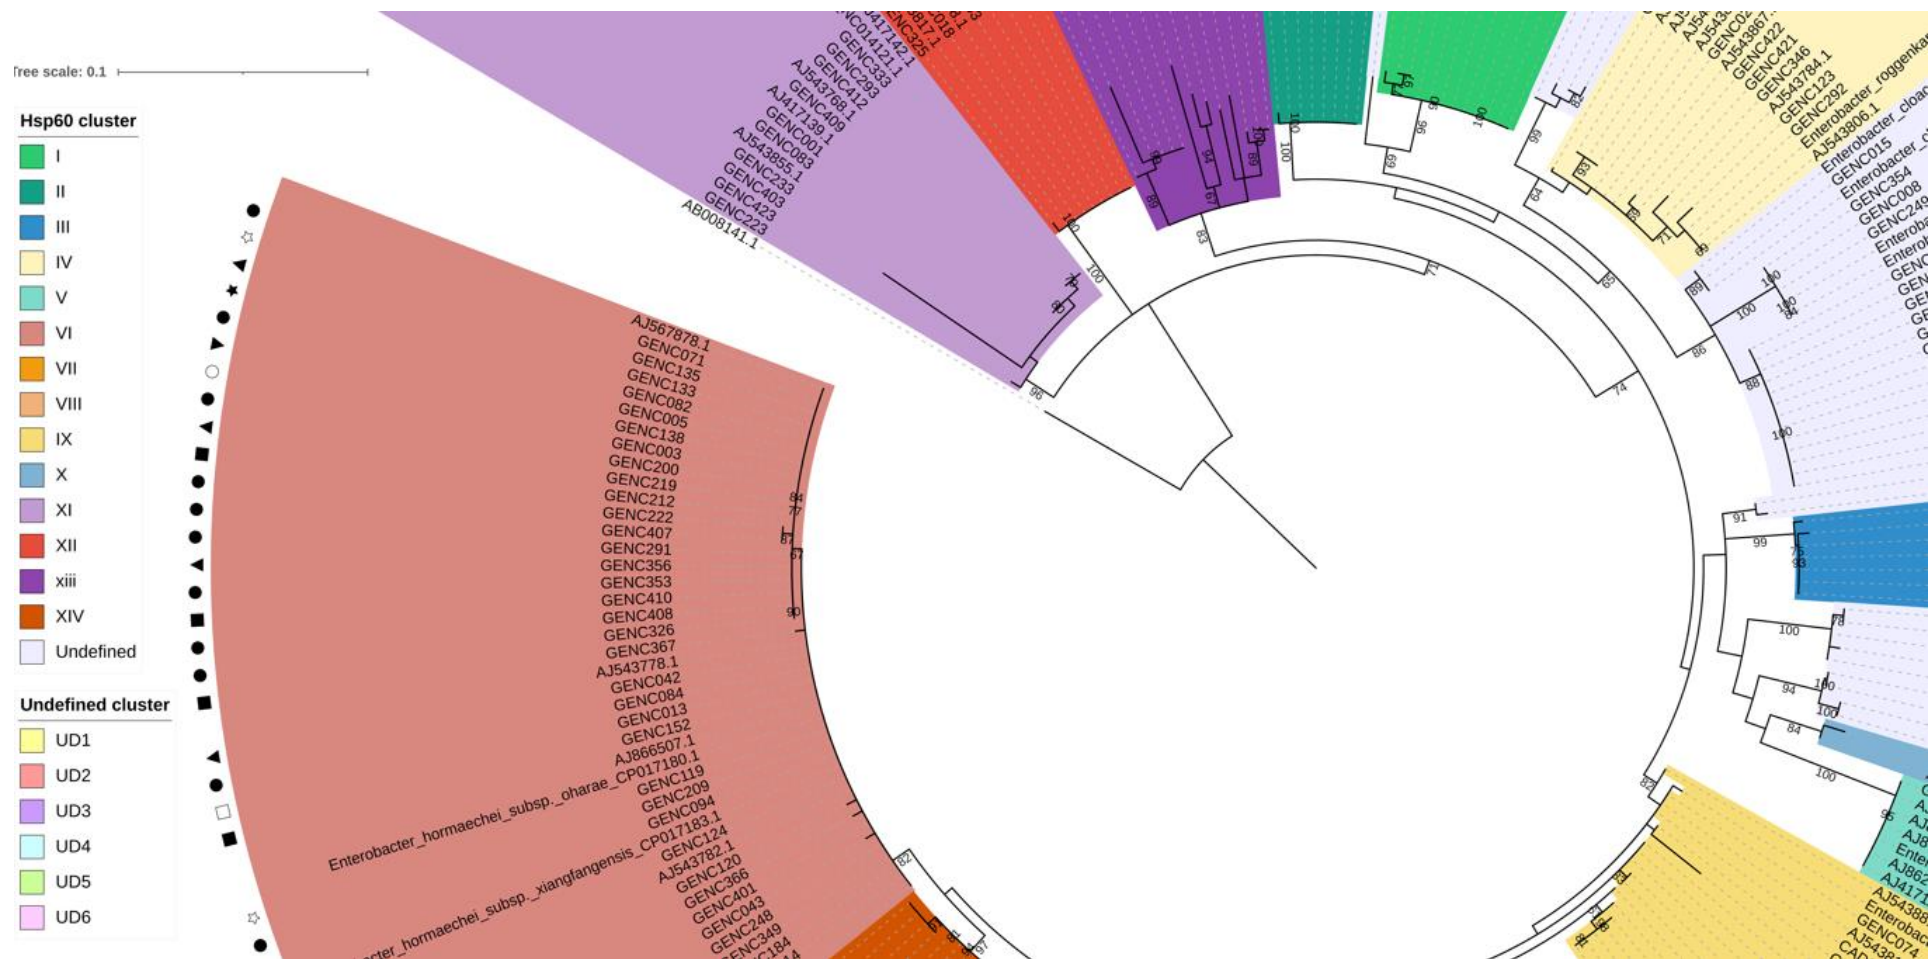

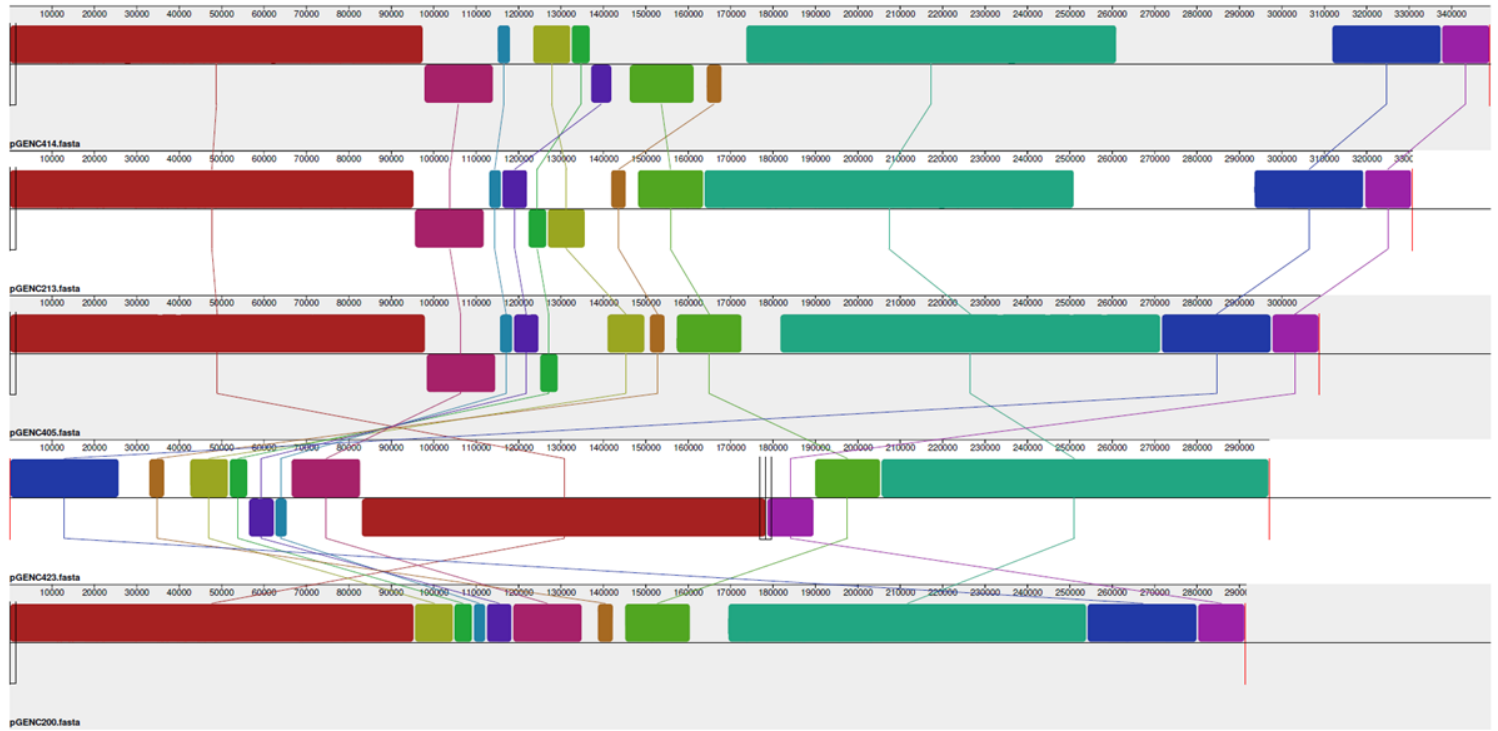

**Figure S4. Alignment of the five analyzed *bla*<sub>CTX-M-15</sub>/*IncHI2*/*ST1* plasmids.** Mauve software v2.4.0 was used to perform this alignment to visualize rearrangements and inversions within whole-sequenced plasmids from clinical ECC strains in Guadeloupe [10]. The plasmid order is based on their length: pGENC414 (349,057 bp; isolated from *E. cloacae* complex taxon 4), pGENC213 (330,805 bp; *E. xiangfangensis*), pGENC405 (308,992 bp; *E. asburiae*), pGENC423 (297,001 bp; *E. cloacae*) and pGENC200 (291,493 bp; *E. xiangfangensis*).



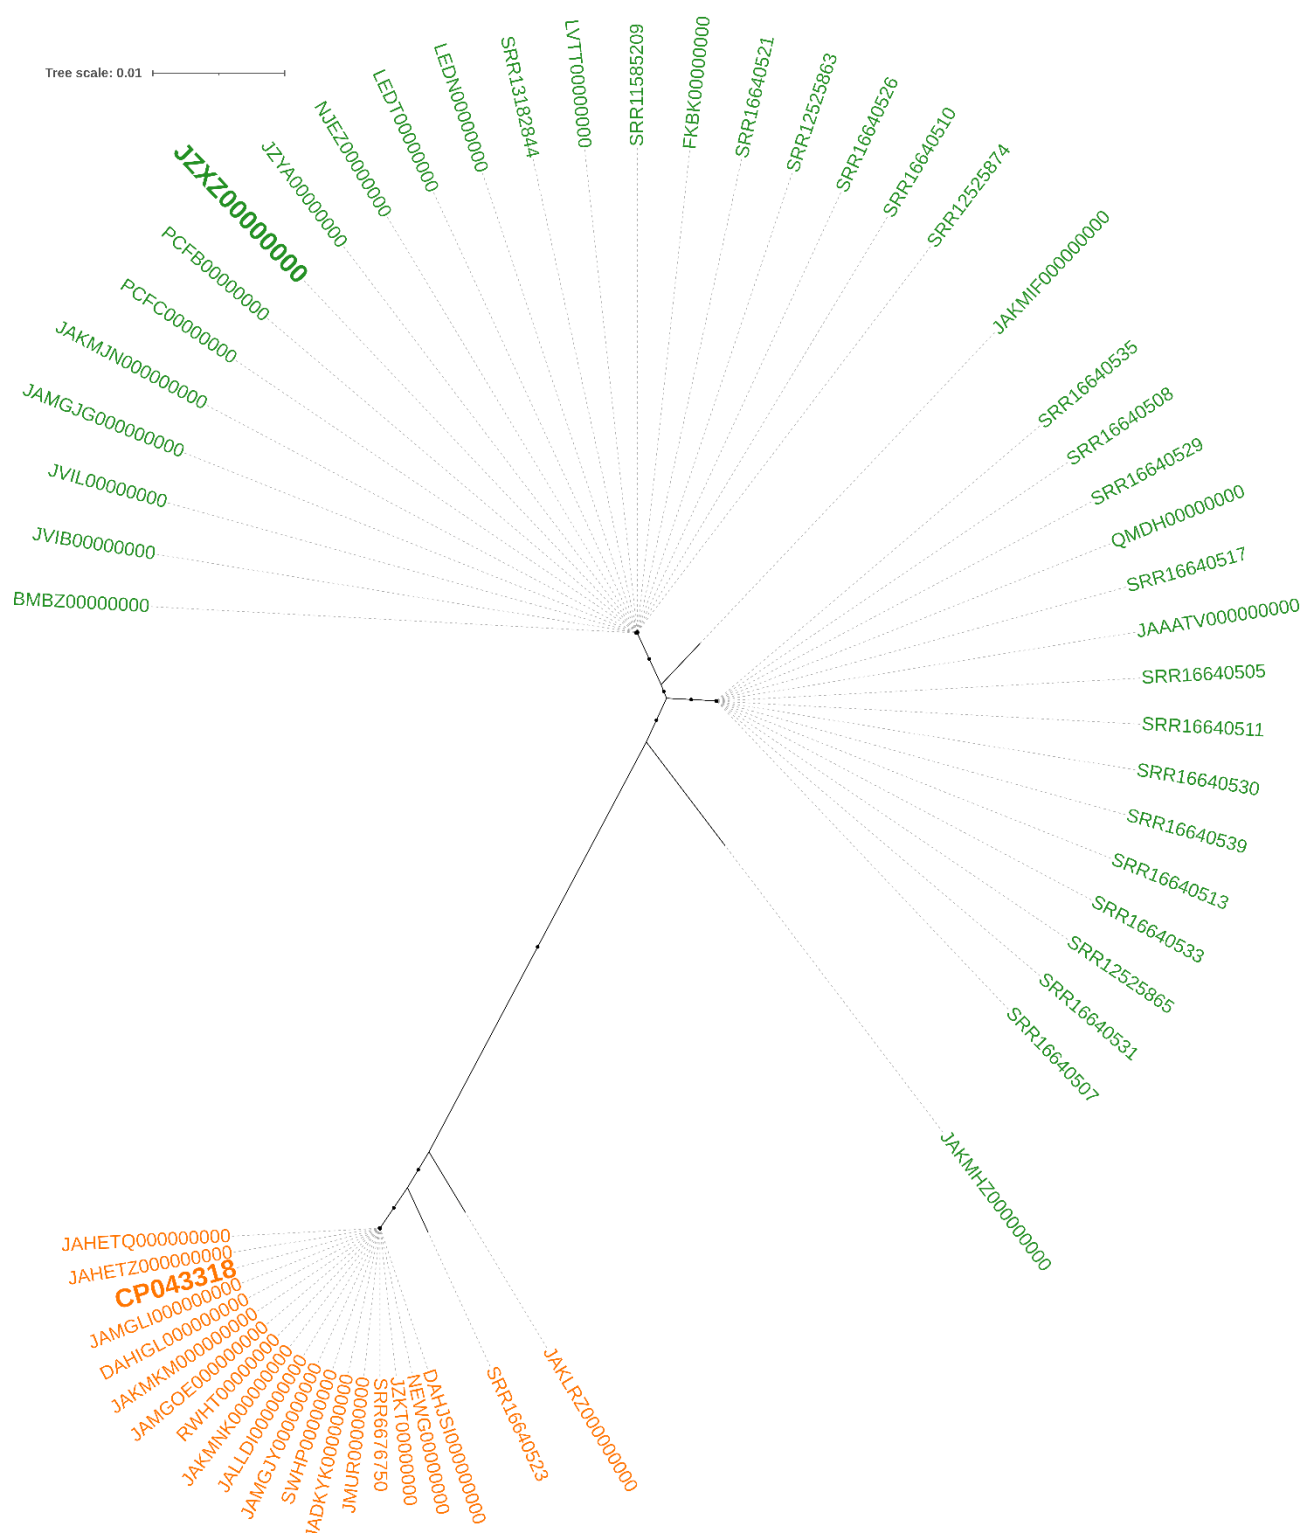

**Figure S5. Maximum likelihood unrooted phylogenetic tree of *E. cloacae* complex Sutton's clade L members** [7]. Sequences were downloaded from GenBank on 29 June 2022 [11]. This tree is based on the core-genome (-cd FLOAT 95: 3,295 genes; global alignment of 3,260,739 bp) and was drawn with iTOL after maximum likelihood phylogenetic reconstruction with IQ-tree and associated dependencies (-merit BIC: GTR+F+I+G4 -ufboot 1,000 -bnni) [1-4, 12]. Only bootstrap values equal to 100% are indicated by a black circle. According to Wu and colleagues approach, strains related to *E. cloacae* complex taxon 4 (reference in bold: JZXZ000000000) are in green ( $n = 38$ ), while isolates of *E. chengduensis* (reference: CP043318) are in orange ( $n = 20$ ) [13,14]. For associated ANI and isDDH outputs against references, see Supplementary Data Set S4 [7,13,15,16].



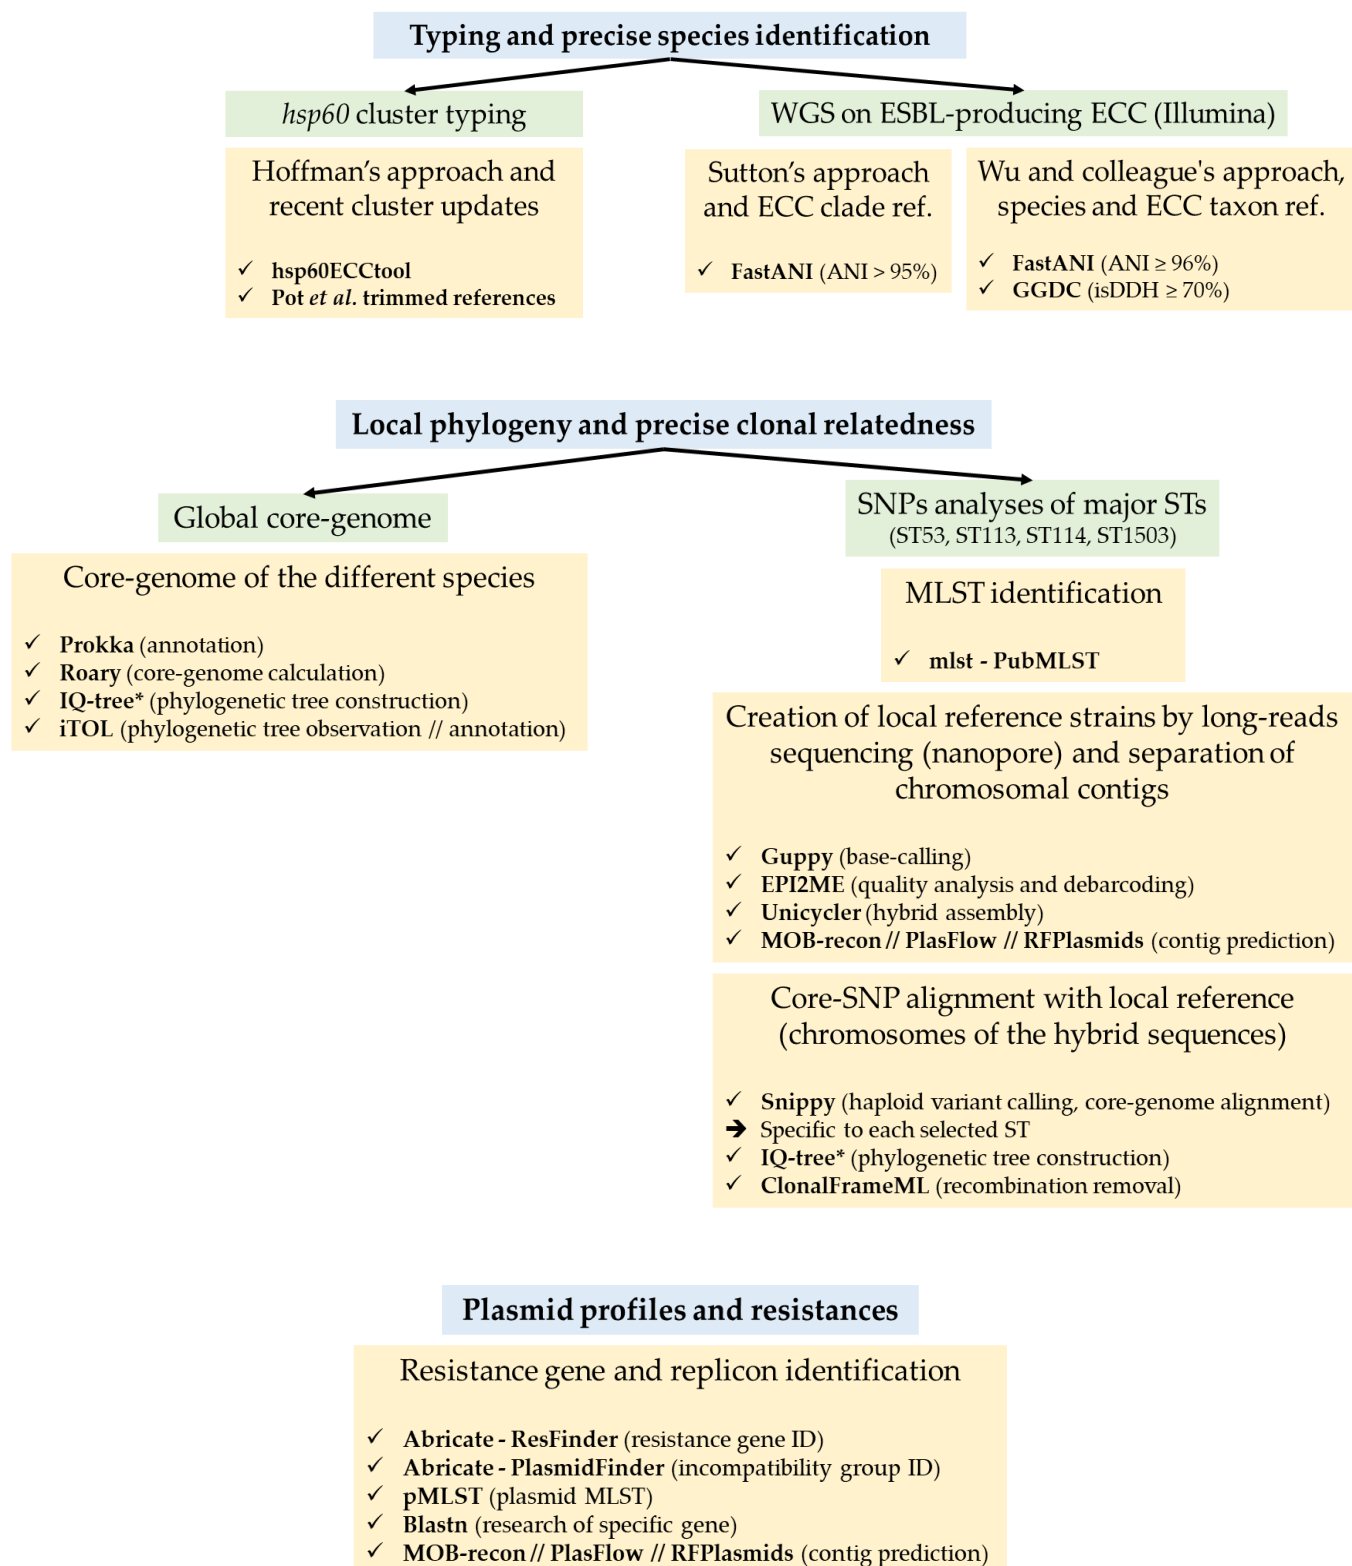

Figure S6. Continued on page 15

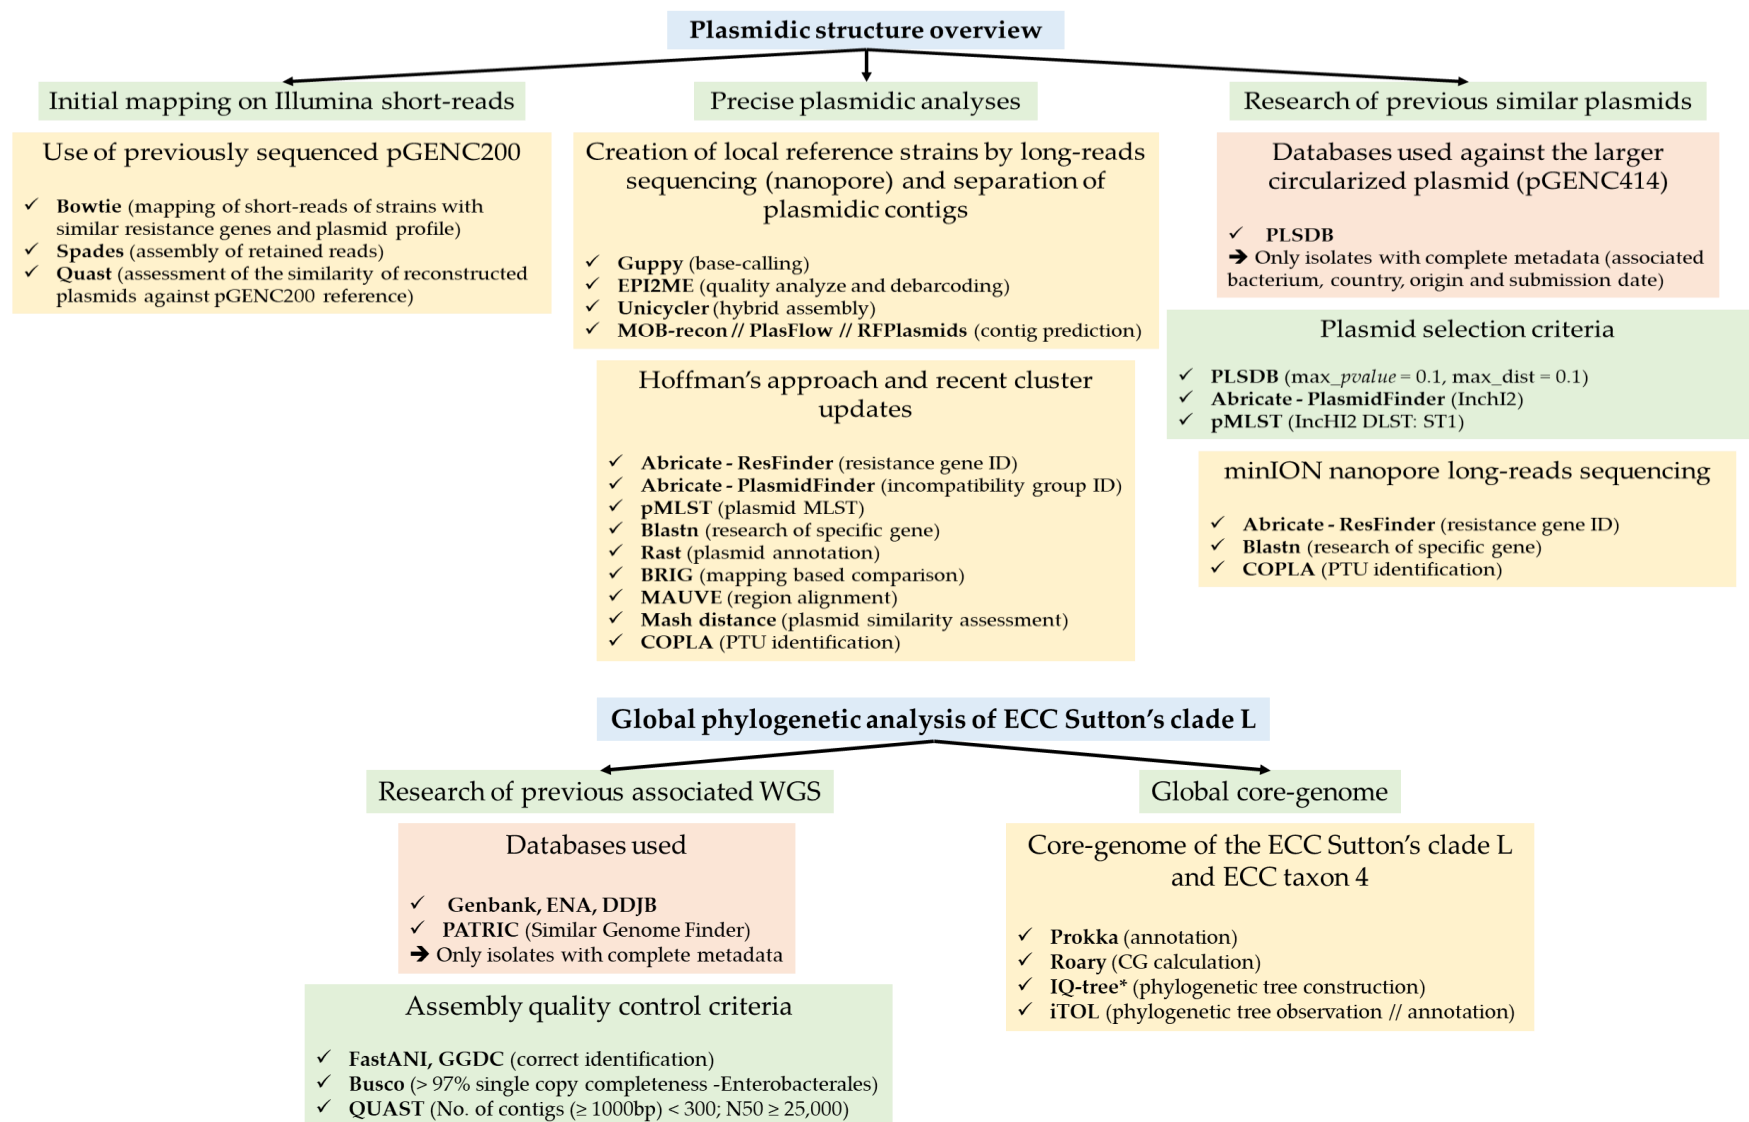

**Figure S6. Schematic diagram of Materials and Methods – Section 4.** Used software tools are indicated in bold and their applications in the study are in parentheses. \*IQ-tree is associated with ModelFinder and UFBoot2. Pot *et al.* trimmed *hsp60* references were the same as those used in our previous manuscript [8]. They are listed on Figure S3 legend.

**Table S1. Prevalence of resistant *E. cloacae* complex (ECC) isolates for each tested antibiotic.** ECC strains ( $n = 135$ ) were grouped according to their resistance to  $\beta$ -lactam antibiotics: wild-type (WT), extended spectrum  $\beta$ -lactamase (ESBL), cephalosporinase overproduction (CoP– without ESBL gene), or carbapenemase production (CP). All strains were resistant to ampicillin (10  $\mu$ g), amoxicillin–clavulanic acid (20  $\mu$ g – 10  $\mu$ g) and ceftoxitin (30  $\mu$ g; see Supplementary Data Set S1 for details; disc diffusion method on Mueller-Hinton medium, 2018 CA-SFM/EUCAST guideline [17].

| Antibiotic                                                        | Resistance to $\beta$ -lactam |              |              |             |
|-------------------------------------------------------------------|-------------------------------|--------------|--------------|-------------|
|                                                                   | WT                            | CoP          | ESBL         | CP          |
|                                                                   | ( $n = 41$ )                  | ( $n = 36$ ) | ( $n = 57$ ) | ( $n = 1$ ) |
| Ticarcillin (75 $\mu$ g)                                          | 1 (2.4)                       | 36 (100.0)   | 57 (100.0)   | 1 (100.0)   |
| Temocillin (30 $\mu$ g)                                           | –                             | 30 (83.3)    | 31 (54.4)    | 1 (100.0)   |
| Cefotaxime (5 $\mu$ g)                                            | –                             | 36 (100.0)   | 57 (100.0)   | 1 (100.0)   |
| Ceftazidime (10 $\mu$ g)                                          | –                             | 34 (94.4)    | 57 (100.0)   | 1 (100.0)   |
| Aztreonam (30 $\mu$ g)                                            | –                             | 28 (77.8)    | 57 (100.0)   | 1 (100.0)   |
| Ertapenem (10 $\mu$ g)                                            | –                             | 17 (47.2)    | 3 (5.3)      | 1 (100.0)   |
| Cefepim (30 $\mu$ g)                                              | –                             | –            | 57 (100.0)   | 1 (100.0)   |
| Nalidixic acid (30 $\mu$ g)                                       | 2 (4.9)                       | 6 (16.7)     | 53 (93.0)    | 1 (100.0)   |
| Ciprofloxacin (5 $\mu$ g)                                         | 1 (2.4)                       | 6 (16.7)     | 51 (89.5)    | 1 (100.0)   |
| Gentamicin (10 $\mu$ g)                                           | –                             | 3 (8.3)      | 45 (79.0)    | –           |
| Amikacin (30 $\mu$ g)                                             | –                             | –            | 1 (1.8)      | –           |
| Tigecycline (15 $\mu$ g)                                          | 3 (7.3)                       | 5 (13.9)     | 7 (12.3)     | –           |
| Trimethoprim – sulfamethoxazole<br>(1.25 $\mu$ g – 23.75 $\mu$ g) | 1 (2.4)                       | 3 (8.3)      | 49 (86.0)    | 1 (100.0)   |

**Table S2. Abundance of identified resistance genes among the 57 *E. cloacae* complex (ECC) strains characterized as ESBL producers.** Strains were grouped at species level. The *mdf(A)* and *oqxA/oqxB* genes were identified in all strains as AmpC coding genes (not included in this table) [18,19]. Details are provided in Supplementary Data Set S1. \**E.qah* = *E. quasihormaechei*; \**E. xian* = *E. xiangfangensis*.

| Gene                           | <i>E. asburiae</i><br>(n = 6) | <i>E. bugandensis</i><br>(n = 2) | <i>E. cloacae</i><br>(n = 2) | ECC Taxon 4<br>(n = 15) | <i>E. qah</i> .*<br>(n = 1) | <i>E. xian</i> .**<br>(n = 31) | Total<br>(n = 57) |
|--------------------------------|-------------------------------|----------------------------------|------------------------------|-------------------------|-----------------------------|--------------------------------|-------------------|
| <i>bla</i> <sub>CTX-M-15</sub> | 6 (100.0)                     | 2 (100.0)                        | 2 (100.0)                    | 15 (100.0)              | 1 (100.0)                   | 30 (96.8)                      | 56 (98.2)         |
| <i>dfrA14</i>                  | 5 (83.3)                      | –                                | 1 (50.0)                     | 15 (100.0)              | 1 (100.0)                   | 30 (96.8)                      | 52 (91.2)         |
| <i>fosA</i>                    | 1 (16.7)                      | 2 (100.0)                        | 2 (100.0)                    | 15 (100.0)              | 1 (100.0)                   | 30 (96.8)                      | 51 (89.5)         |
| <i>qnrB1</i>                   | 5 (83.3)                      | –                                | 1 (50.0)                     | 14 (93.3)               | 1 (100.0)                   | 28 (90.3)                      | 49 (86.0)         |
| <i>aac(3)-IIa</i>              | 5 (83.3)                      | –                                | –                            | 13 (86.7)               | 1 (100.0)                   | 26 (83.9)                      | 45 (78.9)         |
| <i>aph(3'')-Ib</i>             | 4 (66.7)                      | –                                | 1 (50.0)                     | 14 (93.3)               | 1 (100.0)                   | 25 (80.6)                      | 45 (78.9)         |
| <i>aph(6)-Id</i>               | 4 (66.7)                      | –                                | 1 (50.0)                     | 14 (93.3)               | 1 (100.0)                   | 25 (80.6)                      | 45 (78.9)         |
| <i>sul2</i>                    | 4 (66.7)                      | –                                | 1 (50.0)                     | 14 (93.3)               | –                           | 25 (80.6)                      | 44 (77.2)         |
| <i>bla</i> <sub>TEM-1B</sub>   | 2 (33.3)                      | –                                | 1 (50.0)                     | 14 (93.3)               | –                           | 25 (80.6)                      | 42 (73.7)         |
| <i>tet(A)</i>                  | 5 (83.3)                      | –                                | 1 (50.0)                     | 14 (93.3)               | 1 (100.0)                   | 19 (61.3)                      | 40 (70.2)         |
| <i>aac(6')-Ib-cr</i>           | 4 (66.7)                      | –                                | 2 (100.0)                    | 11 (73.3)               | –                           | 19 (61.3)                      | 36 (63.2)         |
| <i>catB3</i>                   | 4 (66.7)                      | –                                | 1 (50.0)                     | 11 (73.3)               | –                           | 20 (64.5)                      | 36 (63.2)         |
| <i>bla</i> <sub>OXA-1</sub>    | 4 (66.7)                      | –                                | 1 (50.0)                     | 11 (73.3)               | –                           | 19 (61.3)                      | 35 (61.4)         |
| <i>sul1</i>                    | 3 (50.0)                      | –                                | 1 (50.0)                     | 4 (26.7)                | 1 (100.0)                   | 14 (45.2)                      | 23 (40.4)         |
| <i>catA1</i>                   | 3 (50.0)                      | –                                | –                            | 3 (20.0)                | –                           | 13 (41.9)                      | 19 (33.3)         |
| <i>dfrA1</i>                   | –                             | –                                | –                            | –                       | –                           | 5 (16.1)                       | 5 (8.8)           |
| <i>aadA2</i>                   | –                             | –                                | –                            | 3 (20.0)                | –                           | 1 (3.2)                        | 4 (7.0)           |
| <i>ant(3'')-Ia</i>             | –                             | –                                | –                            | 2 (13.3)                | –                           | 2 (6.5)                        | 4 (7.0)           |
| <i>qnrB19</i>                  | 1 (16.7)                      | –                                | –                            | 1 (6.7)                 | –                           | 2 (6.5)                        | 4 (7.0)           |
| <i>mcr-9</i>                   | –                             | –                                | –                            | –                       | –                           | 2 (6.5)                        | 2 (3.5)           |
| <i>aac(3)-I</i>                | –                             | –                                | –                            | –                       | –                           | 1 (3.2)                        | 1 (1.8)           |
| <i>aac(3)-Ia</i>               | –                             | –                                | –                            | –                       | –                           | 1 (3.2)                        | 1 (1.8)           |
| <i>aadA10</i>                  | –                             | –                                | –                            | –                       | –                           | 1 (3.2)                        | 1 (1.8)           |
| <i>aadA16</i>                  | –                             | –                                | 1 (50.0)                     | –                       | –                           | –                              | 1 (1.8)           |
| <i>aph(3')-VIa</i>             | –                             | –                                | –                            | 1 (6.7)                 | –                           | –                              | 1 (1.8)           |
| <i>ARR-3</i>                   | –                             | –                                | 1 (50.0)                     | –                       | –                           | –                              | 1 (1.8)           |
| <i>bla</i> <sub>GES-7</sub>    | –                             | –                                | –                            | –                       | –                           | 1 (3.2)                        | 1 (1.8)           |
| <i>bla</i> <sub>OXA-2</sub>    | –                             | –                                | –                            | 1 (6.7)                 | –                           | –                              | 1 (1.8)           |
| <i>dfrA10</i>                  | –                             | –                                | –                            | –                       | –                           | 1 (3.2)                        | 1 (1.8)           |
| <i>dfrA15</i>                  | –                             | –                                | 1 (50.0)                     | –                       | –                           | –                              | 1 (1.8)           |
| <i>dfrA27</i>                  | –                             | –                                | 1 (50.0)                     | –                       | –                           | –                              | 1 (1.8)           |
| <i>dfrA32</i>                  | –                             | –                                | –                            | –                       | –                           | 1 (3.2)                        | 1 (1.8)           |
| <i>mph(E)</i>                  | –                             | –                                | –                            | –                       | –                           | 1 (3.2)                        | 1 (1.8)           |
| <i>msr(E)</i>                  | –                             | –                                | –                            | –                       | –                           | 1 (3.2)                        | 1 (1.8)           |
| <i>qnrE1</i>                   | 1 (16.7)                      | –                                | –                            | –                       | –                           | –                              | 1 (1.8)           |
| <i>qnrS1</i>                   | –                             | –                                | 1 (50.0)                     | –                       | –                           | –                              | 1 (1.8)           |
| <i>qnrS2</i>                   | –                             | –                                | –                            | –                       | –                           | 1 (3.2)                        | 1 (1.8)           |
| <i>tet(C)</i>                  | –                             | –                                | –                            | 1 (6.7)                 | –                           | –                              | 1 (1.8)           |
| <i>tet(D)</i>                  | –                             | –                                | –                            | –                       | –                           | 1 (3.2)                        | 1 (1.8)           |

**Table S3. Quast comparison of plasmids from previously sequenced pGENC200 (*E. xiangfangensis*, sequence type (ST) 114, CP061495) vs. reconstructed plasmids with an IncHI2 incompatibility group [20].** *E. cloacae* complex (ECC) plasmids were first reconstructed against the complete sequence of a locally representative plasmid (pGENC200) with Botwie2 (v2.4.2) and assembled with SPAdes (v3.12.0) [21–23]. Because of incomplete raw data, this analysis was not done for GENC010 and GENC016. Initial identification of incompatibility groups and plasmid typing was carried out with PlasmidFinder and pMLST (v2.0) databases [18,24]. Location prediction of the ESBL-coding gene by MOB-recon (v3.0.3), PlasFlow (v1.1.0) and RFPlasmids (v0.0.18) tools was divergent for two strains and predicted with only two types of software for only one isolate (\*) [25–27]. Plasmid type was not defined for four strains (ND; For all details see Supplementary Data Set S1). Strains selected for long-read sequencing are specified with two stars.

| Strain  | WGS previous clade | Precise species identification | ST       | Predicted <i>bla</i> <sub>CTX-M-15</sub> location | IncHI2 DLST conf. | Plasmidic reconstruction |                         |
|---------|--------------------|--------------------------------|----------|---------------------------------------------------|-------------------|--------------------------|-------------------------|
|         |                    |                                |          |                                                   |                   | Mapped length (bp)       | % identity vs. pGENC200 |
| GENC353 | A                  | <i>E. xiangfangensis</i>       | 114      | Plasmid                                           | ST1               | 300,545                  | 88.05                   |
| GENC356 | A                  | <i>E. xiangfangensis</i>       | 114      | Plasmid                                           | ST1               | 348,301                  | 90.68                   |
| GENC326 | A                  | <i>E. xiangfangensis</i>       | 114      | Plasmid                                           | ST1               | 348,731                  | 91.02                   |
| GENC408 | A                  | <i>E. xiangfangensis</i>       | 114      | Plasmid                                           | ST1               | 419,303                  | 91.03                   |
| GENC212 | A                  | <i>E. xiangfangensis</i>       | 114      | Plasmid                                           | ST1               | 293,302                  | 91.05                   |
| GENC138 | A                  | <i>E. xiangfangensis</i>       | 114      | Plasmid                                           | ST1               | 266,170                  | 91.14                   |
| GENC071 | A                  | <i>E. xiangfangensis</i>       | 114      | Plasmid                                           | ST1               | 419,766                  | 91.25                   |
| GENC219 | A                  | <i>E. xiangfangensis</i>       | 114      | Plasmid                                           | ST1               | 398,055                  | 91.27                   |
| GENC291 | A                  | <i>E. xiangfangensis</i>       | 114      | Chromosome                                        | ST1               | 295,215                  | 93.07                   |
| GENC410 | A                  | <i>E. xiangfangensis</i>       | 114      | Plasmid                                           | ST1               | 295,623                  | 94.02                   |
| GENC005 | A                  | <i>E. xiangfangensis</i>       | 114      | Plasmid                                           | ST1               | 281,763                  | 96.18                   |
| GENC082 | A                  | <i>E. xiangfangensis</i>       | 114      | Chromosome                                        | ST1               | 291,977                  | 96.43                   |
| GENC214 | A                  | <i>E. xiangfangensis</i>       | 171      | Chromosome                                        | ND                | 293,064                  | 82.71                   |
| GENC184 | A                  | <i>E. xiangfangensis</i>       | 171      | Chromosome                                        | ND                | 292,593                  | 83.06                   |
| GENC152 | A                  | <i>E. xiangfangensis</i>       | 544      | Plasmid                                           | ST1               | 294,402                  | 94.42                   |
| GENC094 | A                  | <i>E. xiangfangensis</i>       | 544      | Plasmid                                           | ST1               | 331,971                  | 95.05                   |
| GENC209 | A                  | <i>E. xiangfangensis</i>       | –        | Plasmid                                           | ST1               | 319,223                  | 92.31                   |
| GENC202 | B                  | <i>E. xiangfangensis</i>       | 45       | Plasmid                                           | ST1               | 296,246                  | 93.53                   |
| GENC039 | B                  | <i>E. xiangfangensis</i>       | 113      | Plasmid                                           | ST1               | 262,592                  | 90.04                   |
| GENC017 | B                  | <i>E. xiangfangensis</i>       | 113      | Plasmid                                           | ST1               | 274,488                  | 94.03                   |
| GENC155 | B                  | <i>E. xiangfangensis</i>       | 113      | Plasmid                                           | ST1               | 293,740                  | 94.33                   |
| GENC213 | B                  | <i>E. xiangfangensis</i>       | 113      | Plasmid                                           | ST1               | 293,871                  | 95.03                   |
| **      |                    |                                |          |                                                   |                   |                          |                         |
| GENC351 | B                  | <i>E. xiangfangensis</i>       | 133      | Chromosome                                        | ST1               | 294,508                  | 96.47                   |
| GENC007 | B                  | <i>E. xiangfangensis</i>       | 190      | Plasmid                                           | ST1               | 278,479                  | 95.35                   |
| GENC423 | G                  | <i>E. cloacae</i>              | 167      | Plasmid*                                          | ST1               | 304,198                  | 93.87                   |
| **      |                    |                                |          |                                                   |                   |                          |                         |
| GENC199 | J                  | <i>E. asburiae</i>             | 53       | Divergent                                         | ND                | 295,301                  | 95.74                   |
| GENC183 | J                  | <i>E. asburiae</i>             | 53       | Divergent                                         | ST1               | 294,168                  | 96.20                   |
| GENC405 | J                  | <i>E. asburiae</i>             | 53       | Plasmid                                           | ST1               | 294,851                  | 96.51                   |
| **      |                    |                                |          |                                                   |                   |                          |                         |
| GENC354 | L                  | ECC taxon 4                    | 598,1799 | Plasmid                                           | ST1               | 301,774                  | 88.12                   |
| GENC249 | L                  | ECC taxon 4                    | 598,1799 | Plasmid                                           | ND                | 294,606                  | 95.36                   |
| GENC008 | L                  | ECC taxon 4                    | 598,1799 | Plasmid                                           | ST1               | 294,984                  | 96.25                   |
| GENC324 | L                  | ECC taxon 4                    | 1503     | Plasmid                                           | ST1               | 298,878                  | 93.18                   |
| GENC415 | L                  | ECC taxon 4                    | 1503     | Plasmid                                           | ST1               | 294,336                  | 93.75                   |
| GENC217 | L                  | ECC taxon 4                    | 1503     | Plasmid                                           | ST1               | 298,999                  | 94.05                   |
| GENC411 | L                  | ECC taxon 4                    | 1503     | Plasmid                                           | ST1               | 294,385                  | 94.18                   |
| GENC139 | L                  | ECC taxon 4                    | 1503     | Plasmid                                           | ST1               | 298,027                  | 94.20                   |
| GENC187 | L                  | ECC taxon 4                    | 1503     | Plasmid                                           | ST1               | 294,553                  | 94.68                   |
| GENC414 | L                  | ECC taxon 4                    | 1503     | Plasmid                                           | ST1               | 298,854                  | 94.76                   |
| **      |                    |                                |          |                                                   |                   |                          |                         |



## References

1. Letunic, I.; Bork, P. Interactive Tree of Life (iTOL) v5: An online tool for phylogenetic tree display and annotation. *Nucleic Acids Res.* **2021**, *49*, W293–W296. <https://doi.org/10.1093/nar/gkab301>.
2. Nguyen, L.T.; Schmidt, H.A.; von Haeseler, A.; Minh, B.Q. IQ-TREE: A fast and effective stochastic algorithm for estimating maximum-likelihood phylogenies. *Mol. Biol. Evol.* **2015**, *32*, 268–274. <https://doi.org/10.1093/molbev/msu300>.
3. Hoang, D.T.; Chernomor, O.; von Haeseler, A.; Minh, B.Q.; Vinh, L.S. UFBoot2: Improving the ultrafast bootstrap approximation. *Mol. Biol. Evol.* **2018**, *35*, 518–522. <https://doi.org/10.1093/molbev/msx281>.
4. Kalyaanamoorthy, S.; Minh, B.Q.; Wong, T.K.F.; von Haeseler, A.; Jermini, L.S. ModelFinder: Fast model selection for accurate phylogenetic estimates. *Nat. Methods.* **2017**, *14*, 587–589. <https://doi.org/10.1038/nmeth.4285>.
5. Katoh, K.; Standley, D.M. MAFFT multiple sequence alignment software version 7: Improvements in performance and usability. *Mol. Biol. Evol.* **2013**, *30*, 772–780. <https://doi.org/10.1093/molbev/mst010>.
6. Hoffmann, H.; Roggenkamp, A. Population genetics of the nomenclotype *Enterobacter cloacae*. *Appl. Environ. Microbiol.* **2003**, *69*, 5306–5318. <https://doi.org/10.1128/AEM.69.9.5306-5318.2003>.
7. Sutton, G.G.; Brinkac, L.M.; Clarke, T.H.; Fouts, D.E. *Enterobacter hormaechei* subsp. *hoffmannii* subsp. nov., *Enterobacter hormaechei* subsp. *xiangfangensis* comb. nov., *Enterobacter roggenkampii* sp. nov., and *Enterobacter muelleri* is a later heterotypic synonym of *Enterobacter asburiae* based on computational analysis of sequenced *Enterobacter* genomes. *F1000Research* **2018**, *7*, 521. <https://doi.org/10.12688/f1000research>.
8. Pot, M.; Reynaud, Y.; Couvin, D.; Ducat, C.; Ferdinand, S.; Gravey, F.; Gruel, G.; Guérin, F.; Malpote, E.; Breurec, S.; et al. Wide distribution and specific resistance pattern to third-generation cephalosporins of *Enterobacter cloacae* complex members in humans and in the environment in Guadeloupe (French West Indies). *Front. Microbiol.* **2021**, *12*, 628058. <https://doi.org/10.3389/fmicb.2021.628058>.
9. GitHub – hsp60ECCTool. Available online: <https://github.com/karubiotools/hsp60ECCTool> (accessed on 9 November 2021).
10. Darling, A.C.; Mau, B.; Blattner, F.R.; Perna, N.T. Mauve: Multiple alignment of conserved genomic sequence with rearrangements. *Genome Res.* **2004**, *14*, 1394–1403. <https://doi.org/10.1101/gr.2289704>.
11. NCBI Resource Coordinators. Database resources of the National Center for Biotechnology Information. *Nucleic Acids Res.* **2016**, *44*, D7–D19. <https://doi.org/10.1093/nar/gkv1290>.
12. Page, A.J.; Cummins, C.A.; Hunt, M.; Wong, V.K.; Reuter, S.; Holden, M.T.; Fookes, M.; Falush, D.; Keane, J.A.; Parkhill, J. Roary: Rapid large-scale prokaryote pan genome analysis. *Bioinformatics* **2015**, *31*, 3691–3693. <https://doi.org/10.1093/bioinformatics/btv421>.
13. Wu, W.; Feng, Y.; Zong, Z. Precise species identification for *Enterobacter*: A genome sequence-based study with reporting of two novel species, *Enterobacter quasiroggenkampii* sp. nov. and *Enterobacter quasimori* sp. nov. *mSystems* **2020**, *5*, e00527–20. <https://doi.org/10.1128/mSystems.00527-20>.
14. Wu, W.; Feng, Y.; Zong, Z. Characterization of a strain representing a new *Enterobacter* species, *Enterobacter chengduensis* sp. nov. *Antonie Van Leeuwenhoek* **2019**, *112*, 491–500. <https://doi.org/10.1007/s10482-018-1180-z>.
15. Jain, C.; Rodriguez, R.L.M.; Phillippy, A.M.; Konstantinidis, K.T.; Aluru, S. High throughput ANI analysis of 90K prokaryotic genomes reveals clear species boundaries. *Nat. Commun.* **2018**, *9*, 5114. <https://doi.org/10.1038/s41467-018-07641-9>.
16. Meier-Kolthoff, J.P.; Carbasse, J.S.; Peinado-Olarte, R.L.; Göker, M. TYGS and LPSN: A database tandem for fast and reliable genome-based classification and nomenclature of prokaryotes. *Nucleic Acids Res.* **2022**, *50*, D801–D807. <https://doi.org/10.1093/nar/gkab902>.
17. Société Française de Microbiologie. CA-SFM / EUCAST: Comité de L’antibiogramme de la Société Française de Microbiologie — Recommandation 2018; Société Française de Microbiologie: Paris, France, 2018; pp. 1–132.
18. GitHub – Abricate. Available online: <https://github.com/tseemann/abicate> (accessed on 19 April 2020).
19. Florensa, A.F.; Kaas, R.S.; Clausen, P.T.L.C.; Aytan-Aktug, D.; Aarestrup, F.M. ResFinder—An open online resource for identification of antimicrobial resistance genes in next-generation sequencing data and prediction of phenotypes from genotypes. *Microb. Genom.* **2022**, *8*, 000748. <https://doi.org/10.1099/mgen.0.000748>.
20. Gurevich, A.; Saveliev, V.; Vyahhi, N.; Tesler, G. QUAST: Quality assessment tool for genome assemblies. *Bioinformatics* **2013**, *29*, 1072–1075. <https://doi.org/10.1093/bioinformatics/btt086>.
21. Pot, M.; Guyomard-Rabenirina, S.; Couvin, D.; Ducat, C.; Enouf, V.; Ferdinand, S.; Gruel, G.; Malpote, E.; Talarmin, A.; Breurec, S.; et al. Dissemination of extended-spectrum- $\beta$ -Lactamase-producing *Enterobacter cloacae* complex from a hospital to the nearby environment in Guadeloupe (French West Indies): ST114 Lineage coding for a successful IncHI2/ST1 plasmid. *Antimicrob. Agents Chemother.* **2021**, *65*, e02146–20. <https://doi.org/10.1128/AAC.02146-20>.
22. Prjibelski, A.; Antipov, D.; Meleshko, D.; Lapidus, A.; Korobeynikov, A. Using SPAdes *de novo* assembler. *Curr. Protoc. Bioinform.* **2020**, *70*, e102. <https://doi.org/10.1002/cpbi.102>.
23. Langmead, B.; Salzberg, S.L. Fast gapped-read alignment with Bowtie 2. *Nat. Methods.* **2012**, *9*, 357–359. <https://doi.org/10.1038/nmeth.1923>.
24. Carattoli, A.; Zankari, E.; García-Fernández, A.; Voldby Larsen, M.; Lund, O.; Villa, L.; Møller Aarestrup, F.; Hasman, H. In silico detection and typing of plasmids using PlasmidFinder and plasmid multilocus sequence typing. *Antimicrob. Agents Chemother.* **2014**, *58*, 3895–3903. <https://doi.org/10.1128/AAC.02412-14>.
25. Krawczyk, P.S.; Lipinski, L.; Dziembowski, A. PlasFlow: Predicting plasmid sequences in metagenomic data using genome signatures. *Nucleic Acids Res.* **2018**, *46*, e35. <https://doi.org/10.1093/nar/gkx1321>.

- 
26. van der Graaf-van Bloois, L.; Wagenaar, J.A.; Zomer, A.L. RFPlasmid: Predicting plasmid sequences from short-read assembly data using machine learning. *Microb. Genom.* **2021**, *7*, 000683. <https://doi.org/10.1099/mgen.0.000683>.
  27. Robertson, J.; Nash, J.H.E. MOB-suite: Software tools for clustering, reconstruction and typing of plasmids from draft assemblies. *Microb. Genom.* **2018**, *4*, e000206. <https://doi.org/10.1099/mgen.0.000206>.
